# Supplementary material for: Systems biology based meth-miRNA–mRNA regulatory network identifies metabolic imbalance and hyperactive cell cycle signaling involved in hepatocellular carcinoma onset and progression
Source: Springer Nature journal article supplement (doi:10.1186/s12935-019-0804-3), 2019-04-08
Supplement: MOESM1 [file 16629798]

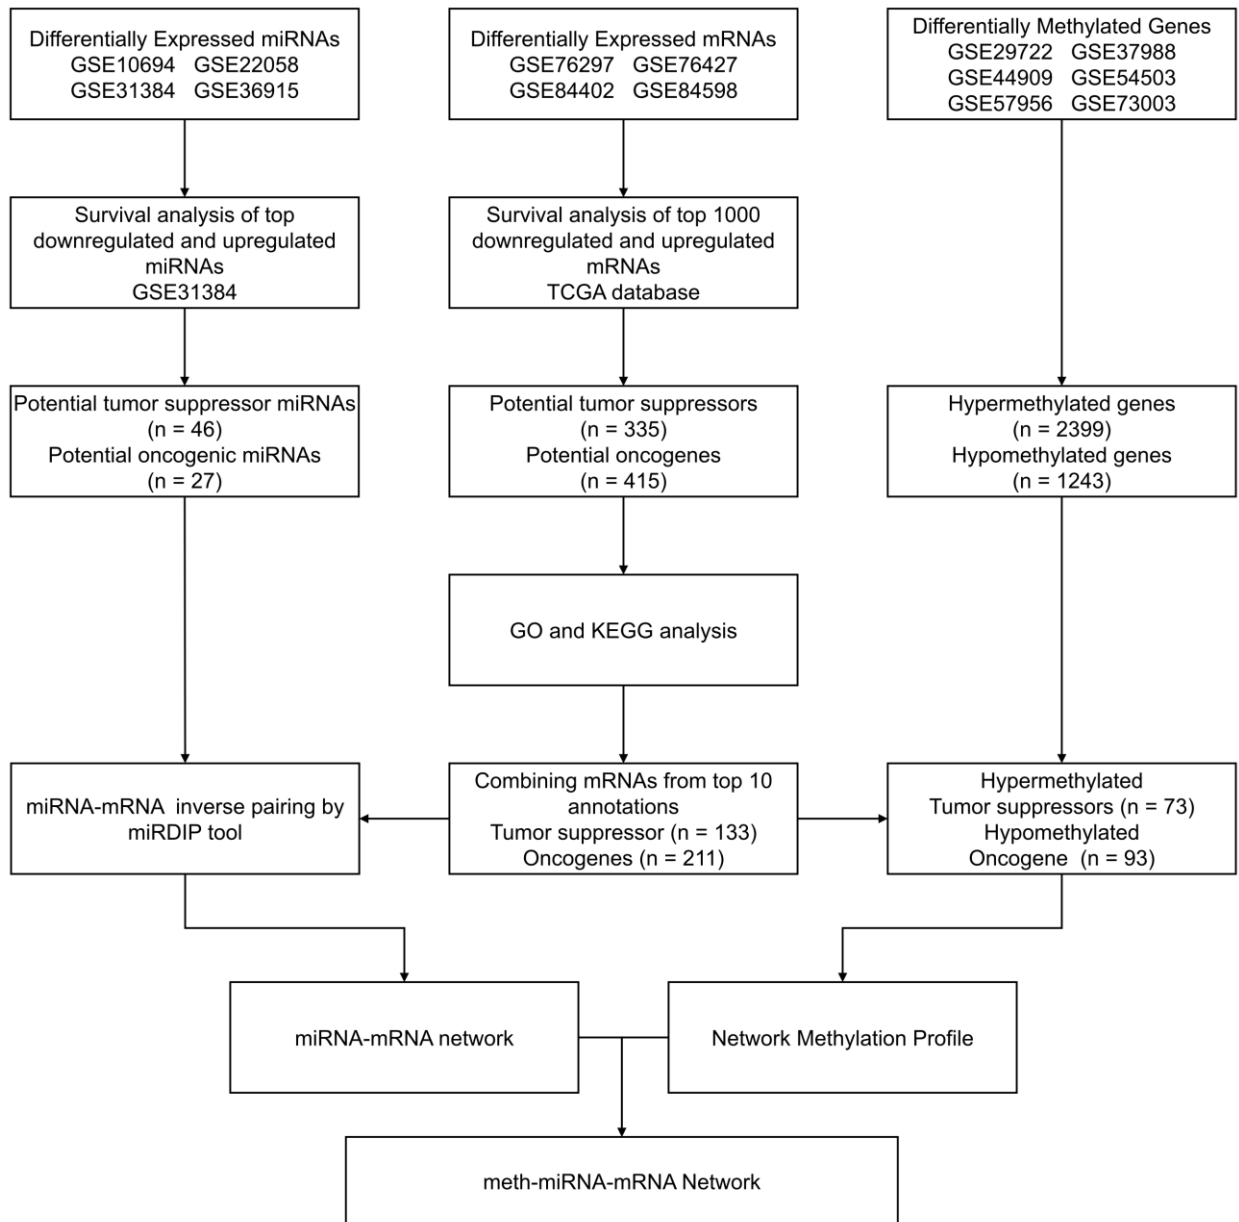

**Fig. S1 Flowchart of constructing meth-miRNA-mRNA network.**
