# Supplementary material for: Systems biology based meth-miRNA–mRNA regulatory network identifies metabolic imbalance and hyperactive cell cycle signaling involved in hepatocellular carcinoma onset and progression
Source: Springer Nature journal article supplement (doi:10.1186/s12935-019-0804-3), 2019-04-08
Supplement: MOESM2 [file 16629798]

**Table S1 List of potential tumor suppressors and oncogenes.** Left; Tumor suppressors which are downregulated in HCC and whose higher expressions are associated with good survival of HCC patients from TCGA database are listed along with hazard ratio (HR), associated p-value and number of patients (N). Right; Oncogenes which are upregulated in HCC and whose higher expression are associated with poor survival of HCC patients from GEO dataset GSE31384 are listed along with hazard ratio (HR), associated p-value and number of patients (N).

| <b>Tumor Suppressor</b> | <b>HR</b> | <b>p-value</b> | <b>N</b> | <b>Oncogene</b> | <b>HR</b> | <b>p-value</b> | <b>N</b> |
|-------------------------|-----------|----------------|----------|-----------------|-----------|----------------|----------|
| <b>RAMP3</b>            | 0.43      | 2.63E-06       | 360      | <b>CDC20</b>    | 2.62      | 1.41E-07       | 360      |
| <b>DNASE1L3</b>         | 0.44      | 4.86E-06       | 360      | <b>HN1</b>      | 2.52      | 3.8E-07        | 360      |
| <b>SOCS2</b>            | 0.44      | 6.25E-06       | 360      | <b>CDCA8</b>    | 2.47      | 5.63E-07       | 360      |
| <b>CRY2</b>             | 0.45      | 1.03E-05       | 360      | <b>GTPBP4</b>   | 2.40      | 1.34E-06       | 360      |
| <b>DMGDH</b>            | 0.45      | 0.000012       | 360      | <b>NEIL3</b>    | 2.32      | 3.14E-06       | 360      |
| <b>PPARGC1A</b>         | 0.45      | 0.000015       | 360      | <b>KIF2C</b>    | 2.26      | 5.81E-06       | 360      |
| <b>SLC2A2</b>           | 0.47      | 2.29E-05       | 360      | <b>BIRC5</b>    | 2.26      | 7.43E-06       | 360      |
| <b>CFHR3</b>            | 0.47      | 3.25E-05       | 360      | <b>TRIP13</b>   | 2.24      | 7.99E-06       | 360      |
| <b>HMGCS2</b>           | 0.47      | 3.33E-05       | 360      | <b>SLC41A3</b>  | 2.23      | 8.5E-06        | 360      |
| <b>PSD4</b>             | 0.48      | 3.61E-05       | 360      | <b>CSTF2</b>    | 2.21      | 9.28E-06       | 360      |
| <b>NDRG2</b>            | 0.48      | 0.000040       | 360      | <b>SPATS2</b>   | 2.18      | 1.55E-05       | 360      |
| <b>PON1</b>             | 0.48      | 4.17E-05       | 360      | <b>TMEM106C</b> | 2.17      | 1.66E-05       | 360      |
| <b>FYN</b>              | 0.48      | 4.28E-05       | 360      | <b>CENPA</b>    | 2.16      | 2.05E-05       | 360      |
| <b>ITIH1</b>            | 0.48      | 5.34E-05       | 360      | <b>EZH2</b>     | 2.16      | 2.26E-05       | 360      |
| <b>SLC22A1</b>          | 0.48      | 5.95E-05       | 360      | <b>SPC25</b>    | 2.14      | 2.47E-05       | 360      |
| <b>ROBO4</b>            | 0.49      | 6.02E-05       | 360      | <b>DR1</b>      | 2.14      | 3.04E-05       | 360      |
| <b>CPEB3</b>            | 0.49      | 0.000063       | 360      | <b>RAD54L</b>   | 2.12      | 2.89E-05       | 360      |
| <b>GOT2</b>             | 0.49      | 6.33E-05       | 360      | <b>CENPH</b>    | 2.12      | 3.11E-05       | 360      |
| <b>DHRS1</b>            | 0.50      | 0.000106       | 360      | <b>WDR53</b>    | 2.11      | 3.48E-05       | 360      |
| <b>MGMT</b>             | 0.50      | 0.000135       | 360      | <b>E2F8</b>     | 2.10      | 3.66E-05       | 360      |
| <b>ADRA2B</b>           | 0.51      | 0.000126       | 360      | <b>CENPL</b>    | 2.10      | 0.000037       | 360      |
| <b>GNA14</b>            | 0.51      | 0.000146       | 360      | <b>HMMR</b>     | 2.09      | 3.91E-05       | 360      |
| <b>GIMAP7</b>           | 0.51      | 0.000158       | 360      | <b>LIN9</b>     | 2.08      | 5.35E-05       | 360      |
| <b>IQGAP2</b>           | 0.51      | 0.000160       | 360      | <b>SF3B4</b>    | 2.07      | 5.01E-05       | 360      |
| <b>TPPP2</b>            | 0.51      | 0.000163       | 360      | <b>SMG5</b>     | 2.07      | 0.000051       | 360      |
| <b>MYCT1</b>            | 0.51      | 0.000163       | 360      | <b>MPV17</b>    | 2.05      | 6.27E-05       | 360      |
| <b>UPB1</b>             | 0.51      | 0.000166       | 360      | <b>TIPIN</b>    | 2.05      | 7.21E-05       | 360      |
| <b>MASP1</b>            | 0.52      | 0.000222       | 360      | <b>RAB10</b>    | 2.04      | 6.39E-05       | 360      |
| <b>TMEM220</b>          | 0.52      | 0.000239       | 360      | <b>SGOL2</b>    | 2.04      | 6.94E-05       | 360      |
| <b>TAT</b>              | 0.52      | 0.000254       | 360      | <b>CDC7</b>     | 2.04      | 7.03E-05       | 360      |
| <b>ADH4</b>             | 0.52      | 0.000259       | 360      | <b>KIAA0101</b> | 2.04      | 0.000076       | 360      |
| <b>ENG</b>              | 0.52      | 0.000269       | 360      | <b>EEF1E1</b>   | 2.04      | 9.68E-05       | 360      |
| <b>LIMS2</b>            | 0.52      | 0.000290       | 360      | <b>KIFC1</b>    | 2.02      | 8.92E-05       | 360      |
| <b>APOB</b>             | 0.52      | 0.000296       | 360      | <b>PA2G4</b>    | 2.02      | 0.000097       | 360      |
| <b>SLC10A1</b>          | 0.52      | 0.000298       | 360      | <b>SKA1</b>     | 2.01      | 0.000120       | 360      |
| <b>IL18RAP</b>          | 0.52      | 0.000313       | 360      | <b>SGOL1</b>    | 2.00      | 0.000118       | 360      |
| <b>GP6</b>              | 0.52      | 0.000334       | 360      | <b>LAPTM4B</b>  | 2.00      | 0.000159       | 360      |
| <b>CCDC69</b>           | 0.53      | 0.000454       | 360      | <b>KIF15</b>    | 1.99      | 0.000111       | 360      |
| <b>ASPA</b>             | 0.53      | 0.000475       | 360      | <b>MRPS23</b>   | 1.99      | 0.000126       | 360      |
| <b>CYP3A43</b>          | 0.54      | 0.000542       | 360      | <b>CCNB1</b>    | 1.99      | 0.000141       | 360      |
| <b>FTCD</b>             | 0.54      | 0.000550       | 360      | <b>MAD2L1</b>   | 1.98      | 0.000141       | 360      |
| <b>CYP2C19</b>          | 0.54      | 0.000557       | 360      | <b>E2F6</b>     | 1.98      | 0.000146       | 360      |
| <b>AFM</b>              | 0.54      | 0.000557       | 360      | <b>MAPKAPK5</b> | 1.98      | 0.000148       | 360      |
| <b>ESR1</b>             | 0.54      | 0.000561       | 360      | <b>NAT10</b>    | 1.97      | 0.000143       | 360      |
| <b>GYS2</b>             | 0.54      | 0.000574       | 360      | <b>CPSF3</b>    | 1.97      | 0.000156       | 360      |
| <b>CYP2C9</b>           | 0.54      | 0.000583       | 360      | <b>E2F7</b>     | 1.97      | 0.000157       | 360      |
| <b>GABARAPL1</b>        | 0.54      | 0.000597       | 360      | <b>CCNF</b>     | 1.97      | 0.000161       | 360      |

| <b>Tumor Suppressor</b> | <b>HR</b> | <b>p-value</b> | <b>N</b> |
|-------------------------|-----------|----------------|----------|
| APOC1                   | 0.54      | 0.000660       | 360      |
| CSAD                    | 0.54      | 0.000666       | 360      |
| CAT                     | 0.54      | 0.000681       | 360      |
| CYB5D2                  | 0.54      | 0.000684       | 360      |
| SARDH                   | 0.54      | 0.000710       | 360      |
| CPN2                    | 0.54      | 0.000720       | 360      |
| ABCA9                   | 0.54      | 0.000779       | 360      |
| PTPRB                   | 0.55      | 0.000741       | 360      |
| IGFALS                  | 0.55      | 0.000757       | 360      |
| GIMAP8                  | 0.55      | 0.000765       | 360      |
| CYP2C8                  | 0.55      | 0.000801       | 360      |
| IVD                     | 0.55      | 0.000829       | 360      |
| MUT                     | 0.55      | 0.000860       | 360      |
| SPP2                    | 0.55      | 0.000881       | 360      |
| TMPRSS6                 | 0.55      | 0.000945       | 360      |
| DECR1                   | 0.55      | 0.000989       | 360      |
| TCF21                   | 0.56      | 0.000986       | 360      |
| N4BP2L1                 | 0.56      | 0.001045       | 360      |
| PIK3R1                  | 0.56      | 0.001174       | 360      |
| CCL23                   | 0.56      | 0.001283       | 360      |
| SLC31A1                 | 0.56      | 0.001285       | 360      |
| EOMES                   | 0.56      | 0.001287       | 360      |
| ADRA1A                  | 0.56      | 0.001299       | 360      |
| STARD5                  | 0.56      | 0.001325       | 360      |
| ETS2                    | 0.56      | 0.001342       | 360      |
| MMAA                    | 0.56      | 0.001455       | 360      |
| ETFDH                   | 0.56      | 0.001458       | 360      |
| CYP3A5                  | 0.57      | 0.001433       | 360      |
| GPT                     | 0.57      | 0.001489       | 360      |
| ANKRD24                 | 0.57      | 0.001554       | 360      |
| NTF3                    | 0.57      | 0.001772       | 360      |
| F9                      | 0.57      | 0.001809       | 360      |
| CCT6B                   | 0.57      | 0.001925       | 360      |
| LDB2                    | 0.58      | 0.001949       | 360      |
| FGB                     | 0.58      | 0.002011       | 360      |
| SLC41A2                 | 0.58      | 0.002098       | 360      |
| GPR182                  | 0.58      | 0.002109       | 360      |
| SLCO2B1                 | 0.58      | 0.002148       | 360      |
| C8B                     | 0.58      | 0.002151       | 360      |
| ZAP70                   | 0.58      | 0.002189       | 360      |
| HPX                     | 0.58      | 0.002236       | 360      |
| CYP4F12                 | 0.58      | 0.002268       | 360      |
| C2orf40                 | 0.58      | 0.002348       | 360      |
| ANGPTL1                 | 0.58      | 0.002443       | 360      |
| NKG7                    | 0.58      | 0.002453       | 360      |
| GHR                     | 0.58      | 0.002509       | 360      |
| FAM65C                  | 0.58      | 0.002527       | 360      |
| TAPT1                   | 0.58      | 0.002580       | 360      |
| FAHD2A                  | 0.58      | 0.002589       | 360      |
| SPRYD4                  | 0.58      | 0.002671       | 360      |
| SERPINA4                | 0.58      | 0.002739       | 360      |
| SLC25A11                | 0.58      | 0.002854       | 360      |
| ACOT12                  | 0.59      | 0.002709       | 360      |

| <b>Oncogene</b> | <b>HR</b> | <b>p-value</b> | <b>N</b> |
|-----------------|-----------|----------------|----------|
| STMN1           | 1.97      | 0.000188       | 360      |
| MCM6            | 1.96      | 0.000181       | 360      |
| NUF2            | 1.95      | 0.000193       | 360      |
| ATIC            | 1.94      | 0.000215       | 360      |
| TMCO3           | 1.93      | 0.000245       | 360      |
| DLGAP5          | 1.93      | 0.000264       | 360      |
| PIGU            | 1.93      | 0.000280       | 360      |
| HJURP           | 1.92      | 0.000264       | 360      |
| EFNA4           | 1.92      | 0.000276       | 360      |
| NEDD1           | 1.92      | 0.000293       | 360      |
| PPM1G           | 1.92      | 0.000366       | 360      |
| CAD             | 1.91      | 0.000284       | 360      |
| POLQ            | 1.91      | 0.000293       | 360      |
| MCM7            | 1.91      | 0.000308       | 360      |
| VPS26A          | 1.91      | 0.000336       | 360      |
| CKAP5           | 1.90      | 0.000323       | 360      |
| CSE1L           | 1.90      | 0.000343       | 360      |
| TTK             | 1.89      | 0.000372       | 360      |
| OIP5            | 1.89      | 0.000400       | 360      |
| PSMD1           | 1.89      | 0.000459       | 360      |
| RAB1F           | 1.88      | 0.000445       | 360      |
| PLK1            | 1.88      | 0.000504       | 360      |
| PTGES3          | 1.88      | 0.000508       | 360      |
| KIF20A          | 1.87      | 0.000460       | 360      |
| FSD1L           | 1.87      | 0.000479       | 360      |
| KIF11           | 1.87      | 0.000500       | 360      |
| SESTD1          | 1.87      | 0.000503       | 360      |
| AGFG1           | 1.87      | 0.000534       | 360      |
| ANLN            | 1.86      | 0.000505       | 360      |
| MCM2            | 1.86      | 0.000512       | 360      |
| EXO1            | 1.86      | 0.000532       | 360      |
| HDAC2           | 1.86      | 0.000586       | 360      |
| SRD5A3          | 1.86      | 0.000652       | 360      |
| TRAIP           | 1.85      | 0.000596       | 360      |
| RRP15           | 1.85      | 0.000671       | 360      |
| ISY1            | 1.85      | 0.000715       | 360      |
| SNRPD1          | 1.84      | 0.000654       | 360      |
| RBM45           | 1.84      | 0.000697       | 360      |
| RAD51AP1        | 1.83      | 0.000722       | 360      |
| TRMT6           | 1.83      | 0.000735       | 360      |
| VPS72           | 1.83      | 0.000790       | 360      |
| FARSB           | 1.82      | 0.000781       | 360      |
| MELK            | 1.82      | 0.000794       | 360      |
| CHEK1           | 1.82      | 0.000809       | 360      |
| RAE1            | 1.82      | 0.000817       | 360      |
| VRK2            | 1.82      | 0.000820       | 360      |
| PRR11           | 1.82      | 0.000829       | 360      |
| MSH2            | 1.81      | 0.000928       | 360      |
| CCNA2           | 1.81      | 0.000991       | 360      |
| SNRPB2          | 1.81      | 0.000999       | 360      |
| H2AFZ           | 1.81      | 0.001018       | 360      |
| DPH2            | 1.80      | 0.000931       | 360      |
| DEPDC1          | 1.80      | 0.000950       | 360      |

| <b>Tumor Suppressor</b> | <b>HR</b> | <b>p-value</b> | <b>N</b> |
|-------------------------|-----------|----------------|----------|
| DHX58                   | 0.59      | 0.002785       | 360      |
| SLC38A4                 | 0.59      | 0.002843       | 360      |
| IL33                    | 0.59      | 0.002916       | 360      |
| GFRA2                   | 0.59      | 0.002919       | 360      |
| IGF1                    | 0.59      | 0.002940       | 360      |
| RDH16                   | 0.59      | 0.002947       | 360      |
| FBLN5                   | 0.59      | 0.003139       | 360      |
| AKR1D1                  | 0.59      | 0.003242       | 360      |
| RNF125                  | 0.59      | 0.003282       | 360      |
| DBT                     | 0.59      | 0.003348       | 360      |
| FCGRT                   | 0.59      | 0.003373       | 360      |
| AVPR2                   | 0.59      | 0.003402       | 360      |
| SLCO1B1                 | 0.59      | 0.003508       | 360      |
| GLYATL1                 | 0.59      | 0.003861       | 360      |
| COLEC10                 | 0.60      | 0.003631       | 360      |
| GZMH                    | 0.60      | 0.003701       | 360      |
| FMO3                    | 0.60      | 0.003869       | 360      |
| STEAP4                  | 0.60      | 0.003998       | 360      |
| PON3                    | 0.60      | 0.004098       | 360      |
| APOC3                   | 0.60      | 0.004123       | 360      |
| HAGH                    | 0.60      | 0.004127       | 360      |
| MPDZ                    | 0.60      | 0.004186       | 360      |
| FAM149A                 | 0.60      | 0.004186       | 360      |
| SHPK                    | 0.60      | 0.004294       | 360      |
| DPYS                    | 0.60      | 0.004474       | 360      |
| ENPEP                   | 0.60      | 0.004475       | 360      |
| RHOB                    | 0.60      | 0.004487       | 360      |
| MYOM2                   | 0.60      | 0.004527       | 360      |
| DEPDC7                  | 0.60      | 0.004532       | 360      |
| KLF2                    | 0.60      | 0.004540       | 360      |
| AMDHD1                  | 0.60      | 0.004574       | 360      |
| PBLD                    | 0.60      | 0.004876       | 360      |
| KLRB1                   | 0.60      | 0.004914       | 360      |
| SLC17A2                 | 0.60      | 0.004985       | 360      |
| ADH1A                   | 0.60      | 0.005012       | 360      |
| GCDH                    | 0.60      | 0.005016       | 360      |
| ADHFE1                  | 0.60      | 0.005255       | 360      |
| GNMT                    | 0.61      | 0.004836       | 360      |
| APOA1                   | 0.61      | 0.005015       | 360      |
| HPN                     | 0.61      | 0.005058       | 360      |
| GADD45A                 | 0.61      | 0.005166       | 360      |
| ACAT1                   | 0.61      | 0.005449       | 360      |
| SELP                    | 0.61      | 0.005557       | 360      |
| CST7                    | 0.61      | 0.005648       | 360      |
| ACSM3                   | 0.61      | 0.005693       | 360      |
| C16orf45                | 0.61      | 0.005962       | 360      |
| PDE7B                   | 0.61      | 0.005966       | 360      |
| GADD45G                 | 0.61      | 0.006086       | 360      |
| LECT2                   | 0.61      | 0.006138       | 360      |
| METTL7A                 | 0.61      | 0.006147       | 360      |
| FDX1                    | 0.61      | 0.006232       | 360      |
| ADAMTSL2                | 0.61      | 0.006236       | 360      |
| AVPI1                   | 0.61      | 0.006248       | 360      |

| <b>Oncogene</b> | <b>HR</b> | <b>p-value</b> | <b>N</b> |
|-----------------|-----------|----------------|----------|
| DUSP12          | 1.80      | 0.001004       | 360      |
| ITGB1BP1        | 1.80      | 0.001097       | 360      |
| TMEM206         | 1.80      | 0.001197       | 360      |
| KIAA1524        | 1.79      | 0.001080       | 360      |
| APEX2           | 1.79      | 0.001109       | 360      |
| AATF            | 1.79      | 0.001130       | 360      |
| PRC1            | 1.79      | 0.001133       | 360      |
| UBE2T           | 1.79      | 0.001206       | 360      |
| BTF3L4          | 1.79      | 0.001213       | 360      |
| EED             | 1.78      | 0.001206       | 360      |
| GMPS            | 1.78      | 0.001254       | 360      |
| HSF2BP          | 1.78      | 0.001260       | 360      |
| PBK             | 1.78      | 0.001268       | 360      |
| ZNF792          | 1.78      | 0.001287       | 360      |
| NUP85           | 1.78      | 0.001303       | 360      |
| SLC39A1         | 1.78      | 0.001319       | 360      |
| HDAC1           | 1.78      | 0.001365       | 360      |
| NDC80           | 1.77      | 0.001330       | 360      |
| CCT4            | 1.77      | 0.001477       | 360      |
| CKAP2L          | 1.77      | 0.001484       | 360      |
| CEP55           | 1.77      | 0.001490       | 360      |
| STIP1           | 1.76      | 0.001582       | 360      |
| ARF4            | 1.76      | 0.001587       | 360      |
| STIL            | 1.76      | 0.001595       | 360      |
| ATP6V1E1        | 1.76      | 0.001614       | 360      |
| SLC39A10        | 1.76      | 0.001774       | 360      |
| PRIM1           | 1.75      | 0.001683       | 360      |
| NUP205          | 1.75      | 0.001683       | 360      |
| SNRPE           | 1.75      | 0.001685       | 360      |
| GINS1           | 1.75      | 0.001749       | 360      |
| CCDC34          | 1.75      | 0.001915       | 360      |
| TOP2A           | 1.74      | 0.001849       | 360      |
| CENPK           | 1.74      | 0.001865       | 360      |
| CLIC1           | 1.74      | 0.001939       | 360      |
| RRM2            | 1.74      | 0.001960       | 360      |
| KIF14           | 1.73      | 0.002139       | 360      |
| GTF3C2          | 1.73      | 0.002160       | 360      |
| NME6            | 1.73      | 0.002175       | 360      |
| PAK1IP1         | 1.73      | 0.002234       | 360      |
| PIGC            | 1.73      | 0.002286       | 360      |
| PTTG1           | 1.73      | 0.002290       | 360      |
| MKI67           | 1.73      | 0.002326       | 360      |
| SLC39A6         | 1.72      | 0.002374       | 360      |
| CENPI           | 1.72      | 0.002381       | 360      |
| ILF2            | 1.72      | 0.002418       | 360      |
| NCAPG           | 1.72      | 0.002454       | 360      |
| FAM83D          | 1.72      | 0.002473       | 360      |
| EIF2S2          | 1.72      | 0.002491       | 360      |
| XPOT            | 1.71      | 0.002564       | 360      |
| ZNF605          | 1.71      | 0.002575       | 360      |
| FLVCR1          | 1.71      | 0.002605       | 360      |
| EME1            | 1.71      | 0.002667       | 360      |
| ECT2            | 1.71      | 0.002705       | 360      |

| <b>Tumor Suppressor</b> | <b>HR</b> | <b>p-value</b> | <b>N</b> |
|-------------------------|-----------|----------------|----------|
| QDPR                    | 0.61      | 0.006649       | 360      |
| ACADS                   | 0.61      | 0.006703       | 360      |
| MAN2B2                  | 0.61      | 0.006909       | 360      |
| GFOD1                   | 0.62      | 0.006531       | 360      |
| LMO2                    | 0.62      | 0.006596       | 360      |
| XDH                     | 0.62      | 0.006735       | 360      |
| TK2                     | 0.62      | 0.006991       | 360      |
| NR1I2                   | 0.62      | 0.007181       | 360      |
| OIT3                    | 0.62      | 0.007213       | 360      |
| GPR146                  | 0.62      | 0.007250       | 360      |
| KBTBD11                 | 0.62      | 0.007269       | 360      |
| GPT2                    | 0.62      | 0.007317       | 360      |
| C5                      | 0.62      | 0.007400       | 360      |
| RANBP3L                 | 0.62      | 0.007422       | 360      |
| ADI1                    | 0.62      | 0.007508       | 360      |
| CYP27A1                 | 0.62      | 0.007588       | 360      |
| HGD                     | 0.62      | 0.007617       | 360      |
| F7                      | 0.62      | 0.007711       | 360      |
| PRICKLE1                | 0.62      | 0.007797       | 360      |
| PROZ                    | 0.62      | 0.007879       | 360      |
| F2                      | 0.62      | 0.007900       | 360      |
| GRAMD1C                 | 0.62      | 0.007910       | 360      |
| CRHBP                   | 0.62      | 0.007958       | 360      |
| C1RL                    | 0.62      | 0.007992       | 360      |
| RBP4                    | 0.62      | 0.008011       | 360      |
| TTC36                   | 0.62      | 0.008107       | 360      |
| PGM1                    | 0.62      | 0.008218       | 360      |
| SLC46A3                 | 0.62      | 0.008227       | 360      |
| GAMT                    | 0.62      | 0.008308       | 360      |
| FARP2                   | 0.62      | 0.008367       | 360      |
| CYP8B1                  | 0.62      | 0.008456       | 360      |
| DENND1C                 | 0.62      | 0.008842       | 360      |
| ACBD4                   | 0.63      | 0.008420       | 360      |
| CD226                   | 0.63      | 0.008949       | 360      |
| CIDEB                   | 0.63      | 0.008979       | 360      |
| COBLL1                  | 0.63      | 0.009022       | 360      |
| SDS                     | 0.63      | 0.009033       | 360      |
| C1orf168                | 0.63      | 0.009170       | 360      |
| PLAC9                   | 0.63      | 0.009386       | 360      |
| MSRA                    | 0.63      | 0.009441       | 360      |
| SLC16A4                 | 0.63      | 0.009441       | 360      |
| UROC1                   | 0.63      | 0.009571       | 360      |
| C7                      | 0.63      | 0.009641       | 360      |
| ADH1C                   | 0.63      | 0.009685       | 360      |
| TNFRSF1B                | 0.63      | 0.009696       | 360      |
| ANO1                    | 0.63      | 0.009768       | 360      |
| GPM6A                   | 0.63      | 0.010304       | 360      |
| PIPOX                   | 0.63      | 0.010580       | 360      |
| CLDN14                  | 0.63      | 0.010616       | 360      |
| DHTKD1                  | 0.63      | 0.011292       | 360      |
| SLC25A42                | 0.63      | 0.011726       | 360      |
| CBFA2T3                 | 0.64      | 0.011022       | 360      |
| GLYCTK                  | 0.64      | 0.011116       | 360      |

| <b>Oncogene</b> | <b>HR</b> | <b>p-value</b> | <b>N</b> |
|-----------------|-----------|----------------|----------|
| CDCA2           | 1.71      | 0.002706       | 360      |
| SCML2           | 1.71      | 0.002711       | 360      |
| CPSF6           | 1.71      | 0.002801       | 360      |
| YWHAQ           | 1.71      | 0.002905       | 360      |
| NARS            | 1.71      | 0.002933       | 360      |
| RFC4            | 1.70      | 0.002938       | 360      |
| LCLAT1          | 1.70      | 0.002954       | 360      |
| CDC6            | 1.70      | 0.002957       | 360      |
| BRIX1           | 1.70      | 0.003173       | 360      |
| DAP3            | 1.70      | 0.003179       | 360      |
| YEATS2          | 1.70      | 0.003355       | 360      |
| SEC61G          | 1.69      | 0.003298       | 360      |
| CEP250          | 1.69      | 0.003317       | 360      |
| MASTL           | 1.69      | 0.003318       | 360      |
| CHAF1B          | 1.69      | 0.003339       | 360      |
| CDC123          | 1.69      | 0.003387       | 360      |
| GRPEL2          | 1.69      | 0.003444       | 360      |
| AURKB           | 1.69      | 0.003499       | 360      |
| PDIA6           | 1.69      | 0.003532       | 360      |
| PSMD14          | 1.68      | 0.003331       | 360      |
| RAB23           | 1.68      | 0.003648       | 360      |
| CCT7            | 1.68      | 0.003664       | 360      |
| C17orf80        | 1.68      | 0.003717       | 360      |
| CDC25A          | 1.68      | 0.003794       | 360      |
| LMNB1           | 1.68      | 0.003822       | 360      |
| CASP2           | 1.67      | 0.003937       | 360      |
| PDCD10          | 1.67      | 0.003958       | 360      |
| PPIH            | 1.67      | 0.003994       | 360      |
| ANXA2           | 1.67      | 0.004087       | 360      |
| HMGB2           | 1.67      | 0.004369       | 360      |
| PPAT            | 1.66      | 0.004628       | 360      |
| SART3           | 1.66      | 0.004629       | 360      |
| RNASEH2A        | 1.66      | 0.004662       | 360      |
| RIT1            | 1.66      | 0.004716       | 360      |
| KIF2A           | 1.66      | 0.004785       | 360      |
| NUP155          | 1.66      | 0.004829       | 360      |
| SEH1L           | 1.66      | 0.005107       | 360      |
| CDC73           | 1.66      | 0.005865       | 360      |
| SUPT16H         | 1.65      | 0.004809       | 360      |
| FEN1            | 1.65      | 0.004935       | 360      |
| CENPE           | 1.65      | 0.004978       | 360      |
| CDC25C          | 1.65      | 0.005063       | 360      |
| NCL             | 1.65      | 0.005082       | 360      |
| EFTUD2          | 1.65      | 0.005143       | 360      |
| DARS2           | 1.65      | 0.005267       | 360      |
| S100A10         | 1.65      | 0.005360       | 360      |
| TBL1XR1         | 1.65      | 0.005755       | 360      |
| UTP6            | 1.64      | 0.005210       | 360      |
| NUP43           | 1.64      | 0.005316       | 360      |
| CDCA4           | 1.64      | 0.005495       | 360      |
| GLMN            | 1.64      | 0.005587       | 360      |
| RUVBL1          | 1.64      | 0.005610       | 360      |
| POLR3C          | 1.64      | 0.005627       | 360      |

| <b>Tumor Suppressor</b> | <b>HR</b> | <b>p-value</b> | <b>N</b> |
|-------------------------|-----------|----------------|----------|
| ABHD14B                 | 0.64      | 0.011434       | 360      |
| ALDH2                   | 0.64      | 0.011643       | 360      |
| SPSB3                   | 0.64      | 0.011647       | 360      |
| HGFAC                   | 0.64      | 0.011770       | 360      |
| CHST7                   | 0.64      | 0.012011       | 360      |
| CBR4                    | 0.64      | 0.012632       | 360      |
| EPM2A                   | 0.64      | 0.012670       | 360      |
| NPY1R                   | 0.64      | 0.012757       | 360      |
| RCAN1                   | 0.64      | 0.012830       | 360      |
| ASGR2                   | 0.64      | 0.013039       | 360      |
| CYP4V2                  | 0.64      | 0.013047       | 360      |
| C6                      | 0.64      | 0.013393       | 360      |
| ACSM5                   | 0.64      | 0.013402       | 360      |
| CHRNE                   | 0.64      | 0.014125       | 360      |
| POU6F1                  | 0.64      | 0.014131       | 360      |
| HDAC6                   | 0.64      | 0.014730       | 360      |
| SLC9A3R2                | 0.65      | 0.013994       | 360      |
| CYP4F2                  | 0.65      | 0.014041       | 360      |
| GGT5                    | 0.65      | 0.014402       | 360      |
| LYRM5                   | 0.65      | 0.014511       | 360      |
| HAO1                    | 0.65      | 0.014643       | 360      |
| ECHS1                   | 0.65      | 0.015438       | 360      |
| KIAA0922                | 0.65      | 0.015584       | 360      |
| HEBP1                   | 0.65      | 0.015820       | 360      |
| DLG2                    | 0.65      | 0.016034       | 360      |
| RIPK4                   | 0.65      | 0.016353       | 360      |
| DGAT2                   | 0.65      | 0.017572       | 360      |
| ZCCHC24                 | 0.65      | 0.017861       | 360      |
| ALDH8A1                 | 0.65      | 0.018499       | 360      |
| BMPER                   | 0.65      | 0.018607       | 360      |
| SERPINA10               | 0.66      | 0.017776       | 360      |
| KLKB1                   | 0.66      | 0.017786       | 360      |
| OGDHL                   | 0.66      | 0.017842       | 360      |
| LDHD                    | 0.66      | 0.018291       | 360      |
| ACSM2A                  | 0.66      | 0.018702       | 360      |
| NCAN                    | 0.66      | 0.019018       | 360      |
| EPHX2                   | 0.66      | 0.019345       | 360      |
| MRPL54                  | 0.66      | 0.019496       | 360      |
| SPAG7                   | 0.66      | 0.019670       | 360      |
| HAO2                    | 0.66      | 0.020178       | 360      |
| PZP                     | 0.66      | 0.020356       | 360      |
| ABCA8                   | 0.66      | 0.020442       | 360      |
| ALDH9A1                 | 0.66      | 0.020838       | 360      |
| CBS                     | 0.66      | 0.020855       | 360      |
| SLC27A2                 | 0.66      | 0.020891       | 360      |
| ALPL                    | 0.66      | 0.021447       | 360      |
| ZNF18                   | 0.66      | 0.021735       | 360      |
| CFP                     | 0.66      | 0.022201       | 360      |
| CYP2E1                  | 0.66      | 0.022258       | 360      |
| SEC14L2                 | 0.66      | 0.022323       | 360      |
| NDST3                   | 0.66      | 0.022481       | 360      |
| FBP1                    | 0.67      | 0.022517       | 360      |
| SAT2                    | 0.67      | 0.022959       | 360      |

| <b>Oncogene</b> | <b>HR</b> | <b>p-value</b> | <b>N</b> |
|-----------------|-----------|----------------|----------|
| COMMD2          | 1.64      | 0.005655       | 360      |
| TAF6            | 1.64      | 0.005796       | 360      |
| RIOK1           | 1.64      | 0.006393       | 360      |
| PRMT3           | 1.63      | 0.005938       | 360      |
| C5orf34         | 1.63      | 0.005950       | 360      |
| TTLL4           | 1.63      | 0.006107       | 360      |
| BTBD10          | 1.63      | 0.006212       | 360      |
| NDRG3           | 1.63      | 0.006218       | 360      |
| CCT2            | 1.63      | 0.006235       | 360      |
| DTL             | 1.63      | 0.006310       | 360      |
| LRRC42          | 1.63      | 0.006426       | 360      |
| GOLT1B          | 1.63      | 0.006428       | 360      |
| HNRNPR          | 1.63      | 0.006698       | 360      |
| NCAPG2          | 1.63      | 0.006776       | 360      |
| GPATCH4         | 1.63      | 0.006827       | 360      |
| CENPQ           | 1.63      | 0.006852       | 360      |
| IARS            | 1.62      | 0.006357       | 360      |
| HSF2            | 1.62      | 0.006562       | 360      |
| MYO19           | 1.62      | 0.006767       | 360      |
| SNRPA           | 1.62      | 0.006956       | 360      |
| APAF1           | 1.62      | 0.007059       | 360      |
| CBFA2T2         | 1.62      | 0.007062       | 360      |
| CDCA3           | 1.62      | 0.007063       | 360      |
| PHOSPHO2        | 1.62      | 0.007526       | 360      |
| DYNC1LI1        | 1.61      | 0.007658       | 360      |
| POLA2           | 1.61      | 0.007696       | 360      |
| YIF1B           | 1.61      | 0.007699       | 360      |
| PSPH            | 1.61      | 0.007888       | 360      |
| DRG1            | 1.61      | 0.007989       | 360      |
| C5orf28         | 1.61      | 0.008004       | 360      |
| KCMF1           | 1.61      | 0.008181       | 360      |
| HSPA14          | 1.61      | 0.008197       | 360      |
| XRN2            | 1.61      | 0.008724       | 360      |
| HMGN4           | 1.60      | 0.008376       | 360      |
| BRD8            | 1.60      | 0.008417       | 360      |
| C17orf53        | 1.60      | 0.008698       | 360      |
| PPIA            | 1.60      | 0.008704       | 360      |
| XPR1            | 1.60      | 0.008720       | 360      |
| DCTN2           | 1.60      | 0.008758       | 360      |
| NKIRAS2         | 1.60      | 0.008762       | 360      |
| TXNDC9          | 1.60      | 0.008795       | 360      |
| STAM            | 1.60      | 0.008799       | 360      |
| CBX1            | 1.60      | 0.009036       | 360      |
| EIF4A3          | 1.60      | 0.009200       | 360      |
| KIAA0100        | 1.59      | 0.008885       | 360      |
| TDG             | 1.59      | 0.008978       | 360      |
| FANCI           | 1.59      | 0.008983       | 360      |
| TK1             | 1.59      | 0.009343       | 360      |
| KPNB1           | 1.59      | 0.009446       | 360      |
| NVL             | 1.58      | 0.010095       | 360      |
| AURKA           | 1.58      | 0.010270       | 360      |
| UBE2C           | 1.58      | 0.011131       | 360      |
| AGBL5           | 1.57      | 0.010769       | 360      |

| <b>Tumor Suppressor</b> | <b>HR</b> | <b>p-value</b> | <b>N</b> |
|-------------------------|-----------|----------------|----------|
| DAO                     | 0.67      | 0.023178       | 360      |
| WFDC1                   | 0.67      | 0.023474       | 360      |
| ERRFI1                  | 0.67      | 0.023666       | 360      |
| CD247                   | 0.67      | 0.023949       | 360      |
| HAPLN2                  | 0.67      | 0.023962       | 360      |
| GLOD4                   | 0.67      | 0.024175       | 360      |
| AGXT                    | 0.67      | 0.024443       | 360      |
| IGFBP4                  | 0.67      | 0.024604       | 360      |
| CNGA1                   | 0.67      | 0.024803       | 360      |
| HAAO                    | 0.67      | 0.025158       | 360      |
| PCOLCE                  | 0.67      | 0.025488       | 360      |
| SUCLG2                  | 0.67      | 0.025530       | 360      |
| SLC27A5                 | 0.67      | 0.025615       | 360      |
| GBA3                    | 0.67      | 0.025959       | 360      |
| DBH                     | 0.67      | 0.026083       | 360      |
| C8A                     | 0.67      | 0.026126       | 360      |
| DNMT3L                  | 0.67      | 0.026161       | 360      |
| NOSTRIN                 | 0.67      | 0.026431       | 360      |
| ZCCHC6                  | 0.67      | 0.027158       | 360      |
| PHYHD1                  | 0.67      | 0.027454       | 360      |
| DLC1                    | 0.67      | 0.027638       | 360      |
| NR3C2                   | 0.68      | 0.027902       | 360      |
| SRD5A2                  | 0.68      | 0.028050       | 360      |
| CXCL2                   | 0.68      | 0.028134       | 360      |
| PCK2                    | 0.68      | 0.028747       | 360      |
| LAMB2                   | 0.68      | 0.029266       | 360      |
| AGXT2                   | 0.68      | 0.029509       | 360      |
| AKR7A3                  | 0.68      | 0.029517       | 360      |
| CD14                    | 0.68      | 0.029733       | 360      |
| ABCA6                   | 0.68      | 0.030049       | 360      |
| ADRA1B                  | 0.68      | 0.030209       | 360      |
| LTK                     | 0.68      | 0.030644       | 360      |
| MAMDC4                  | 0.68      | 0.031178       | 360      |
| ICAM3                   | 0.68      | 0.031445       | 360      |
| NTHL1                   | 0.68      | 0.031607       | 360      |
| CYP4A11                 | 0.68      | 0.031680       | 360      |
| HADH                    | 0.68      | 0.031734       | 360      |
| LEAP2                   | 0.68      | 0.032371       | 360      |
| SDPR                    | 0.68      | 0.033183       | 360      |
| FMO2                    | 0.68      | 0.033340       | 360      |
| LIME1                   | 0.68      | 0.033797       | 360      |
| MT1X                    | 0.68      | 0.034117       | 360      |
| TMBIM6                  | 0.68      | 0.034229       | 360      |
| F12                     | 0.69      | 0.033348       | 360      |
| PEX11G                  | 0.69      | 0.033937       | 360      |
| MAN1C1                  | 0.69      | 0.034668       | 360      |
| CYP4F3                  | 0.69      | 0.037175       | 360      |
| HABP2                   | 0.69      | 0.037757       | 360      |
| MACROD1                 | 0.69      | 0.037923       | 360      |
| MOGAT1                  | 0.69      | 0.038079       | 360      |
| MEIS3P1                 | 0.69      | 0.038182       | 360      |
| DCN                     | 0.69      | 0.038297       | 360      |
| CNDP1                   | 0.69      | 0.038355       | 360      |

| <b>Oncogene</b> | <b>HR</b> | <b>p-value</b> | <b>N</b> |
|-----------------|-----------|----------------|----------|
| TMEM185B        | 1.57      | 0.010892       | 360      |
| AHSA1           | 1.57      | 0.010909       | 360      |
| EIF2B1          | 1.57      | 0.010948       | 360      |
| CAPRIN1         | 1.57      | 0.011326       | 360      |
| USP39           | 1.57      | 0.011433       | 360      |
| FAM127A         | 1.57      | 0.011633       | 360      |
| MCM3            | 1.57      | 0.011790       | 360      |
| PPIL1           | 1.57      | 0.011832       | 360      |
| HPS3            | 1.57      | 0.011865       | 360      |
| DCK             | 1.57      | 0.011943       | 360      |
| C1orf112        | 1.57      | 0.012041       | 360      |
| CENPJ           | 1.57      | 0.012256       | 360      |
| TIPRL           | 1.56      | 0.012443       | 360      |
| ENAH            | 1.56      | 0.012609       | 360      |
| THOC7           | 1.56      | 0.012750       | 360      |
| PSMA1           | 1.56      | 0.012911       | 360      |
| FUBP1           | 1.56      | 0.012954       | 360      |
| ME2             | 1.56      | 0.013071       | 360      |
| MND1            | 1.56      | 0.013186       | 360      |
| HNRNPM          | 1.56      | 0.013966       | 360      |
| MRPL9           | 1.55      | 0.013449       | 360      |
| KIF20B          | 1.55      | 0.013582       | 360      |
| WDR70           | 1.55      | 0.013644       | 360      |
| DCLRE1B         | 1.55      | 0.013685       | 360      |
| GINS4           | 1.55      | 0.014129       | 360      |
| TAF1B           | 1.55      | 0.014140       | 360      |
| ZNF346          | 1.55      | 0.014159       | 360      |
| DENND5A         | 1.55      | 0.014233       | 360      |
| TLCD1           | 1.55      | 0.014264       | 360      |
| NUP37           | 1.55      | 0.014333       | 360      |
| SSB             | 1.55      | 0.014599       | 360      |
| ASF1B           | 1.55      | 0.014772       | 360      |
| PUS7            | 1.55      | 0.014790       | 360      |
| CDV3            | 1.55      | 0.014868       | 360      |
| EDC3            | 1.54      | 0.014938       | 360      |
| NME7            | 1.54      | 0.015014       | 360      |
| SENP1           | 1.54      | 0.015112       | 360      |
| DCAF16          | 1.54      | 0.015162       | 360      |
| TMEM147         | 1.54      | 0.015659       | 360      |
| TULP3           | 1.54      | 0.015857       | 360      |
| DDX1            | 1.54      | 0.015888       | 360      |
| UTP14A          | 1.54      | 0.015923       | 360      |
| WDR12           | 1.54      | 0.016064       | 360      |
| TSEN15          | 1.54      | 0.016187       | 360      |
| GMFB            | 1.54      | 0.016854       | 360      |
| HTRA2           | 1.54      | 0.017197       | 360      |
| CKS2            | 1.53      | 0.016398       | 360      |
| RFWD3           | 1.53      | 0.016498       | 360      |
| ACTR5           | 1.53      | 0.016509       | 360      |
| CCT6A           | 1.53      | 0.016572       | 360      |
| NAT9            | 1.53      | 0.016783       | 360      |
| TPRKB           | 1.53      | 0.016788       | 360      |
| ZNF84           | 1.53      | 0.016812       | 360      |

| <b>Tumor Suppressor</b> | <b>HR</b> | <b>p-value</b> | <b>N</b> |
|-------------------------|-----------|----------------|----------|
| <b>ABHD6</b>            | 0.69      | 0.038451       | 360      |
| <b>JDP2</b>             | 0.69      | 0.038514       | 360      |
| <b>ORM1</b>             | 0.69      | 0.038851       | 360      |
| <b>ALAS1</b>            | 0.69      | 0.038976       | 360      |
| <b>BAZ2B</b>            | 0.69      | 0.039518       | 360      |
| <b>FOXF1</b>            | 0.69      | 0.039601       | 360      |
| <b>SLC25A34</b>         | 0.69      | 0.039896       | 360      |
| <b>NAT2</b>             | 0.69      | 0.040466       | 360      |
| <b>MST1</b>             | 0.69      | 0.040503       | 360      |
| <b>LHPP</b>             | 0.69      | 0.040578       | 360      |
| <b>CA5A</b>             | 0.69      | 0.041395       | 360      |
| <b>HELQ</b>             | 0.69      | 0.042232       | 360      |
| <b>TTR</b>              | 0.69      | 0.042664       | 360      |
| <b>CDC37L1</b>          | 0.70      | 0.042164       | 360      |
| <b>FGA</b>              | 0.70      | 0.042482       | 360      |
| <b>ADH6</b>             | 0.70      | 0.042544       | 360      |
| <b>CFB</b>              | 0.70      | 0.042802       | 360      |
| <b>PCK1</b>             | 0.70      | 0.043572       | 360      |
| <b>HPD</b>              | 0.70      | 0.043575       | 360      |
| <b>INMT</b>             | 0.70      | 0.043603       | 360      |
| <b>FCN2</b>             | 0.70      | 0.043875       | 360      |
| <b>EFCAB6</b>           | 0.70      | 0.044216       | 360      |
| <b>SIRT5</b>            | 0.70      | 0.044363       | 360      |

| <b>Oncogene</b> | <b>HR</b> | <b>p-value</b> | <b>N</b> |
|-----------------|-----------|----------------|----------|
| <b>ATP7A</b>    | 1.53      | 0.016904       | 360      |
| <b>LBR</b>      | 1.53      | 0.016974       | 360      |
| <b>LYAR</b>     | 1.53      | 0.017027       | 360      |
| <b>CCNB2</b>    | 1.53      | 0.017152       | 360      |
| <b>TKT</b>      | 1.53      | 0.017253       | 360      |
| <b>UTP18</b>    | 1.53      | 0.017262       | 360      |
| <b>TIMELESS</b> | 1.53      | 0.017437       | 360      |
| <b>FASTKD3</b>  | 1.53      | 0.017725       | 360      |
| <b>POLR3F</b>   | 1.53      | 0.017976       | 360      |
| <b>SSR3</b>     | 1.53      | 0.018008       | 360      |
| <b>HAT1</b>     | 1.52      | 0.017937       | 360      |
| <b>CDC23</b>    | 1.52      | 0.018227       | 360      |
| <b>STT3A</b>    | 1.52      | 0.018969       | 360      |
| <b>PDSS1</b>    | 1.52      | 0.019231       | 360      |
| <b>H2AFY</b>    | 1.52      | 0.019370       | 360      |
| <b>PRKAG1</b>   | 1.52      | 0.019405       | 360      |
| <b>RHEB</b>     | 1.52      | 0.019661       | 360      |
| <b>ENOPH1</b>   | 1.52      | 0.01968        | 360      |
| <b>VPS35</b>    | 1.51      | 0.019845       | 360      |
| <b>CDK2</b>     | 1.51      | 0.020123       | 360      |
| <b>GTPBP2</b>   | 1.51      | 0.020138       | 360      |
| <b>BUB3</b>     | 1.51      | 0.020205       | 360      |
| <b>CPSF4</b>    | 1.51      | 0.021305       | 360      |
| <b>RPIA</b>     | 1.51      | 0.021343       | 360      |
| <b>WDYHV1</b>   | 1.51      | 0.021679       | 360      |
| <b>B4GALT3</b>  | 1.51      | 0.021691       | 360      |
| <b>GARS</b>     | 1.51      | 0.021956       | 360      |
| <b>TMEM69</b>   | 1.5       | 0.021586       | 360      |
| <b>FANCF</b>    | 1.50      | 0.021597       | 360      |
| <b>ANAPC7</b>   | 1.50      | 0.021732       | 360      |
| <b>TCHP</b>     | 1.50      | 0.022475       | 360      |
| <b>DVL3</b>     | 1.50      | 0.022594       | 360      |
| <b>PSMB5</b>    | 1.50      | 0.023292       | 360      |
| <b>PCNA</b>     | 1.50      | 0.023368       | 360      |
| <b>ASF1A</b>    | 1.50      | 0.024190       | 360      |
| <b>CPNE1</b>    | 1.50      | 0.024210       | 360      |
| <b>RNASEH1</b>  | 1.49      | 0.024661       | 360      |
| <b>DEDD</b>     | 1.49      | 0.024884       | 360      |
| <b>NAE1</b>     | 1.49      | 0.025059       | 360      |
| <b>DPF2</b>     | 1.49      | 0.025342       | 360      |
| <b>UBE2O</b>    | 1.49      | 0.025871       | 360      |
| <b>AGPS</b>     | 1.49      | 0.026993       | 360      |
| <b>H3F3A</b>    | 1.49      | 0.027916       | 360      |
| <b>FIGNL1</b>   | 1.48      | 0.026747       | 360      |
| <b>SLC38A6</b>  | 1.48      | 0.026822       | 360      |
| <b>PRKDC</b>    | 1.48      | 0.027270       | 360      |
| <b>POLE2</b>    | 1.48      | 0.027450       | 360      |
| <b>SQLE</b>     | 1.48      | 0.027924       | 360      |
| <b>CNOT10</b>   | 1.48      | 0.028151       | 360      |
| <b>DNMT1</b>    | 1.48      | 0.028350       | 360      |
| <b>SNX5</b>     | 1.48      | 0.028626       | 360      |
| <b>C4orf46</b>  | 1.48      | 0.028647       | 360      |
| <b>METTL6</b>   | 1.48      | 0.028813       | 360      |

| <b>Oncogene</b> | <b>HR</b> | <b>p-value</b> | <b>N</b> |
|-----------------|-----------|----------------|----------|
| <b>DEK</b>      | 1.48      | 0.029079       | 360      |
| <b>TPR</b>      | 1.48      | 0.029757       | 360      |
| <b>SF3B1</b>    | 1.48      | 0.030374       | 360      |
| <b>WDSUB1</b>   | 1.47      | 0.029298       | 360      |
| <b>TOPBP1</b>   | 1.47      | 0.029425       | 360      |
| <b>COPS7B</b>   | 1.47      | 0.029550       | 360      |
| <b>SLC4A1AP</b> | 1.47      | 0.030062       | 360      |
| <b>EIF2B4</b>   | 1.47      | 0.030141       | 360      |
| <b>NOL11</b>    | 1.47      | 0.030726       | 360      |
| <b>ITGB3BP</b>  | 1.47      | 0.030981       | 360      |
| <b>PTPDC1</b>   | 1.47      | 0.031169       | 360      |
| <b>ACTR10</b>   | 1.47      | 0.031329       | 360      |
| <b>TMCO1</b>    | 1.47      | 0.031575       | 360      |
| <b>NCBP2</b>    | 1.47      | 0.032696       | 360      |
| <b>PRKAA2</b>   | 1.46      | 0.031617       | 360      |
| <b>MSTO1</b>    | 1.46      | 0.032622       | 360      |
| <b>NPC1</b>     | 1.46      | 0.033519       | 360      |
| <b>CNIH4</b>    | 1.46      | 0.033581       | 360      |
| <b>CALU</b>     | 1.46      | 0.033855       | 360      |
| <b>VPS8</b>     | 1.46      | 0.033884       | 360      |
| <b>DYNLL1</b>   | 1.46      | 0.034200       | 360      |
| <b>NUP107</b>   | 1.46      | 0.034907       | 360      |
| <b>MCM5</b>     | 1.46      | 0.035083       | 360      |
| <b>ADSL</b>     | 1.46      | 0.035761       | 360      |
| <b>ANO10</b>    | 1.45      | 0.035167       | 360      |
| <b>ARL8B</b>    | 1.45      | 0.036124       | 360      |
| <b>ZFP64</b>    | 1.45      | 0.036236       | 360      |
| <b>SDF2</b>     | 1.45      | 0.036270       | 360      |
| <b>DNM1L</b>    | 1.45      | 0.036374       | 360      |
| <b>RAP2A</b>    | 1.45      | 0.036384       | 360      |
| <b>TFRC</b>     | 1.45      | 0.036514       | 360      |
| <b>SAP130</b>   | 1.45      | 0.036524       | 360      |
| <b>VPS45</b>    | 1.45      | 0.037381       | 360      |
| <b>WDR55</b>    | 1.45      | 0.037390       | 360      |
| <b>TTC27</b>    | 1.45      | 0.037794       | 360      |
| <b>EXOSC2</b>   | 1.45      | 0.038312       | 360      |
| <b>LARP4B</b>   | 1.45      | 0.038348       | 360      |
| <b>SETDB1</b>   | 1.45      | 0.038623       | 360      |
| <b>FAF1</b>     | 1.45      | 0.039699       | 360      |
| <b>CDK5</b>     | 1.45      | 0.039762       | 360      |
| <b>WNK1</b>     | 1.44      | 0.039692       | 360      |
| <b>DLG5</b>     | 1.44      | 0.039994       | 360      |
| <b>RBM12B</b>   | 1.44      | 0.040101       | 360      |
| <b>EIF2S3</b>   | 1.44      | 0.040317       | 360      |
| <b>C2orf44</b>  | 1.44      | 0.040466       | 360      |
| <b>CSNK2A1</b>  | 1.44      | 0.042146       | 360      |
| <b>UBAP2L</b>   | 1.44      | 0.044350       | 360      |
| <b>VRK1</b>     | 1.43      | 0.043041       | 360      |
| <b>POLR2H</b>   | 1.43      | 0.043964       | 360      |
| <b>CHRAC1</b>   | 1.43      | 0.044215       | 360      |
