# Supplementary material for: Systems biology based meth-miRNA–mRNA regulatory network identifies metabolic imbalance and hyperactive cell cycle signaling involved in hepatocellular carcinoma onset and progression
Source: Springer Nature journal article supplement (doi:10.1186/s12935-019-0804-3), 2019-04-08
Supplement: MOESM3 [file 16629798]

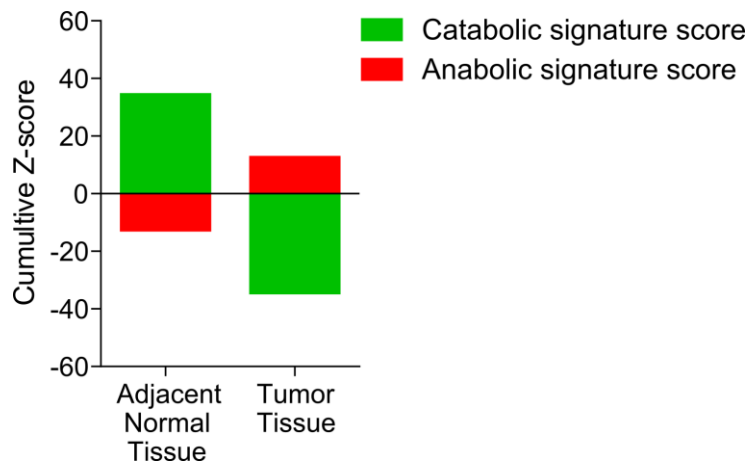

**Fig. S2 Metabolic balance between HCC and adjacent normal tissues.** Bar graph showing cumulative changes in the expression Z-score values of catabolic (n = 70) and anabolic enzymes (n = 39) between HCC tumors and adjacent normal tissues from meta-analysis of data retrieved from NCBI GEO database (GSE76297, GSE76427, GSE84402, and GSE84598).
