# Supplementary material for: Systems biology based meth-miRNA–mRNA regulatory network identifies metabolic imbalance and hyperactive cell cycle signaling involved in hepatocellular carcinoma onset and progression
Source: Springer Nature journal article supplement (doi:10.1186/s12935-019-0804-3), 2019-04-08
Supplement: MOESM5 [file 16629798]

**Table S3 List of targets of tumor suppressor and oncogenic miRNAs in meth-miRNA-mRNA network.**

| <b>Targets of Tumor suppressor miRNAs</b> |                   |                   |                    |                   |
|-------------------------------------------|-------------------|-------------------|--------------------|-------------------|
| <b>miR-105-5p</b>                         | <b>miR-149-3p</b> | <b>miR-194-3p</b> | <b>miR-200b-3p</b> | <b>miR-340-5p</b> |
| AGFG1                                     | AGFG1             | AATF              | AGFG1              | AGFG1             |
| AGPS                                      | AGPS              | AGFG1             | AGPS               | AGPS              |
| ANAPC7                                    | APEX2             | AGPS              | ANLN               | ANLN              |
| ARF4                                      | ARF4              | ANAPC7            | APAF1              | APAF1             |
| ATP7A                                     | ARL8B             | ANLN              | ARL8B              | ARF4              |
| BUB3                                      | ATP7A             | ARF4              | ATP7A              | ARL8B             |
| CCNA2                                     | AURKA             | ARL8B             | CCNA2              | ATP7A             |
| CCNB1                                     | AURKB             | ATP7A             | CCT4               | BUB3              |
| CCT4                                      | BIRC5             | AURKB             | CDC73              | CCNA2             |
| CCT6A                                     | CAD               | BIRC5             | CDK2               | CCNB1             |
| CDC23                                     | CDC23             | BUB3              | CEP55              | CCT7              |
| CDC73                                     | CDC25A            | CCNB1             | CKS2               | CDC123            |
| CDCA2                                     | CDC7              | CCNF              | DDX1               | CDC23             |
| CENPE                                     | CDCA3             | CCT6A             | DYNC1LI1           | CDC7              |
| CENPH                                     | CDCA8             | CCT7              | E2F6               | CDC73             |
| CEP250                                    | CENPA             | CDC23             | FAM83D             | CDCA3             |
| CEP55                                     | CENPE             | CDC25A            | FASTKD3            | CDK2              |
| CHAF1B                                    | CENPJ             | CDC25C            | FUBP1              | CENPH             |
| CHEK1                                     | CEP250            | CDC6              | GMPS               | CENPJ             |
| CKAP5                                     | CEP55             | CDC73             | GTPBP4             | CHEK1             |
| CPSF6                                     | CHEK1             | CDCA8             | HDAC2              | CKAP5             |
| DARS2                                     | CPSF6             | CENPE             | KIF11              | CPSF6             |
| DCK                                       | CSNK2A1           | CENPJ             | KIF14              | CSNK2A1           |
| DCTN2                                     | DARS2             | CEP250            | MSH2               | DARS2             |
| DDX1                                      | E2F6              | CEP55             | NCL                | DDX1              |
| DNM1L                                     | E2F7              | CHEK1             | NDC80              | E2F6              |
| DYNC1LI1                                  | EFTUD2            | CSTF2             | NEDD1              | E2F7              |
| E2F6                                      | EIF2B1            | DCK               | NUP43              | E2F8              |
| EFTUD2                                    | EIF2S3            | DNM1L             | POLQ               | EXO1              |
| FAM83D                                    | EIF4A3            | DYNC1LI1          | PPAT               | FASTKD3           |
| FIGNL1                                    | EXOSC2            | E2F6              | PRKAA2             | FIGNL1            |
| GMPS                                      | FAM83D            | E2F7              | RAB23              | GMPS              |
| GRPEL2                                    | FANCI             | EIF2S3            | RAP2A              | GRPEL2            |
| HDAC2                                     | GTPBP2            | EXO1              | RBM12B             | HDAC1             |
| ILF2                                      | HDAC1             | FAM83D            | RIT1               | HDAC2             |
| KIF14                                     | HDAC2             | FANCI             | SART3              | HSPA14            |
| KIF2A                                     | HSPA14            | FIGNL1            | SNRPB2             | ISY1              |
| KIFC1                                     | IARS              | FUBP1             | SNRPD1             | KIF11             |
| LARP4B                                    | ISY1              | GRPEL2            | SNRPE              | KIF14             |
| LIN9                                      | KIF11             | HDAC1             | SPC25              | KIF20B            |
| MAD2L1                                    | KIF2C             | HDAC2             | SQLE               | KIF2A             |
| MELK                                      | LARP4B            | HJURP             | SSB                | LARP4B            |
| MKI67                                     | MASTL             | HNRNPM            | TIMELESS           | LIN9              |
| NCAPG2                                    | MCM2              | HNRNPR            | TRIP13             | MAD2L1            |
| NCL                                       | MCM5              | ILF2              | VRK2               | MELK              |
| NEDD1                                     | MKI67             | ISY1              | YWHAQ              | MSH2              |
| NEIL3                                     | MYO19             | KIF11             |                    | NAE1              |
| NUP43                                     | NCAPG2            | KIF14             |                    | NCAPG2            |
| PA2G4                                     | NKIRAS2           | KIF20A            |                    | NEDD1             |
| POLA2                                     | NME7              | KIF2A             |                    | NKIRAS2           |
| POLE2                                     | NUP43             | KIF2C             |                    | NME7              |

**Targets of Tumor suppressor miRNAs**

| <b>miR-105-5p</b> | <b>miR-149-3p</b> | <b>miR-194-3p</b> | <b>miR-200b-3p</b> | <b>miR-340-5p</b> |
|-------------------|-------------------|-------------------|--------------------|-------------------|
| PPAT              | PA2G4             | LARP4B            |                    | NUF2              |
| PPIL1             | PLK1              | LIN9              |                    | PCNA              |
| PRKAA2            | POLA2             | MAPKAPK5          |                    | PLK1              |
| PSMD1             | POLQ              | MCM2              |                    | POLQ              |
| PSMD14            | POLR2H            | MCM5              |                    | POLR2H            |
| PTTG1             | POLR3F            | ME2               |                    | PPAT              |
| RAP2A             | PPIL1             | MKI67             |                    | PRKAA2            |
| RBM12B            | PPM1G             | MSH2              |                    | PUS7              |
| RHEB              | PRC1              | NARS              |                    | RAB10             |
| RIT1              | PRKAA2            | NAT10             |                    | RAB23             |
| SEH1L             | PRKAG1            | NCAPG2            |                    | RAD51AP1          |
| SLC4A1AP          | PUS7              | NCBP2             |                    | RAD54L            |
| SPC25             | RAB10             | NCL               |                    | RAP2A             |
| SQLE              | RHEB              | NME6              |                    | RBM12B            |
| TDG               | RIT1              | NME7              |                    | RIOK1             |
| TIMELESS          | SEH1L             | NUF2              |                    | RIT1              |
| TTK               | SF3B1             | NUP37             |                    | SEH1L             |
|                   | SNRPB2            | PA2G4             |                    | SF3B1             |
|                   | SPC25             | PCNA              |                    | SSB               |
|                   | TIMELESS          | POLA2             |                    | TDG               |
|                   | TK1               | POLQ              |                    | TIPIN             |
|                   | UBE2O             | POLR2H            |                    | TOP2A             |
|                   | WNK1              | PPAT              |                    | VRK1              |
|                   | YWHAQ             | PIIH              |                    | VRK2              |
|                   | ZNF346            | PPIL1             |                    | WNK1              |
|                   |                   | PRKAA2            |                    | XPOT              |
|                   |                   | PSMA1             |                    | YWHAQ             |
|                   |                   | PSMB5             |                    |                   |
|                   |                   | PUS7              |                    |                   |
|                   |                   | RAB10             |                    |                   |
|                   |                   | RAB23             |                    |                   |
|                   |                   | RAD51AP1          |                    |                   |
|                   |                   | RAP2A             |                    |                   |
|                   |                   | RHEB              |                    |                   |
|                   |                   | RIT1              |                    |                   |
|                   |                   | RNASEH1           |                    |                   |
|                   |                   | SF3B4             |                    |                   |
|                   |                   | SNRPD1            |                    |                   |
|                   |                   | SNRPE             |                    |                   |
|                   |                   | SPC25             |                    |                   |
|                   |                   | STMN1             |                    |                   |
|                   |                   | TIMELESS          |                    |                   |
|                   |                   | TK1               |                    |                   |
|                   |                   | TPR               |                    |                   |
|                   |                   | TRIP13            |                    |                   |
|                   |                   | TTK               |                    |                   |
|                   |                   | UBE2O             |                    |                   |
|                   |                   | WNK1              |                    |                   |
|                   |                   | XPOT              |                    |                   |
|                   |                   | YWHAQ             |                    |                   |
|                   |                   | ZNF346            |                    |                   |

**Targets of oncogenic miRNAs**

| <b>miR-330-3p</b> | <b>miR-671-3p</b> | <b>miR-671-5p</b> | <b>miR-877-5p</b> | <b>miR-939-5p</b> |
|-------------------|-------------------|-------------------|-------------------|-------------------|
| ADHFE1            | ACSM2A            | ACSM2A            | ADH1A             | ACADS             |
| ALDH2             | ADH6              | ACSM5             | ADH1C             | ACSM5             |
| ALPL              | AGXT              | ADH6              | ALDH9A1           | ADH4              |
| CBR4              | AKR1D1            | AGXT              | ALPL              | ADHFE1            |
| CFP               | AMDHD1            | AMDHD1            | C1RL              | AGXT              |
| CSAD              | C1RL              | C1RL              | CYP2C19           | AKR1D1            |
| CYB5D2            | C7                | C7                | CYP2C8            | ALDH2             |
| CYP2C9            | CAT               | CAT               | CYP2C9            | ALDH8A1           |
| CYP3A43           | CFP               | CBS               | CYP3A43           | ALPL              |
| CYP4F12           | COLEC10           | CFP               | CYP4A11           | C1RL              |
| CYP8B1            | CYP2C9            | CYB5D2            | CYP4F12           | CBR4              |
| DBT               | CYP2E1            | CYP2E1            | CYP8B1            | CNDP1             |
| DHTKD1            | CYP4F2            | CYP4V2            | DAO               | CSAD              |
| DMGDH             | CYP4F3            | CYP8B1            | DBT               | CYP27A1           |
| ETFDH             | CYP4V2            | DBH               | DHRS1             | CYP2C8            |
| F12               | CYP8B1            | DHRS1             | DHTKD1            | CYP2E1            |
| FMO2              | DBT               | DHTKD1            | EPHX2             | CYP3A43           |
| GBA3              | DHRS1             | DPYS              | F7                | CYP4A11           |
| GFOD1             | DHTKD1            | FDX1              | F9                | CYP4F12           |
| GGT5              | FDX1              | FMO2              | FBP1              | CYP4V2            |
| GPT               | FMO2              | FMO3              | FGB               | CYP8B1            |
| HABP2             | FMO3              | GAMT              | FMO2              | DAO               |
| HGD               | GCDH              | GCDH              | FMO3              | DBH               |
| INMT              | GFOD1             | GFOD1             | FTCD              | DBT               |
| MASP1             | GGT5              | GPT2              | GAMT              | DHTKD1            |
| MSRA              | GPT2              | GZMH              | HAAO              | DPYS              |
| PCK1              | HAAO              | HAAO              | HAO2              | EPHX2             |
| PHYHD1            | HABP2             | HABP2             | IVD               | F12               |
| PPARGC1A          | HEBP1             | HADH              | KLKB1             | F7                |
| SLC25A11          | HMGCS2            | HMGCS2            | MASP1             | FMO2              |
| STEAP4            | HPN               | HPN               | MST1              | FTCD              |
| TK2               | INMT              | INMT              | NDST3             | GFOD1             |
| UPB1              | LDHD              | IVD               | PCK2              | GNMT              |
| UROC1             | MAN1C1            | LDHD              | PHYHD1            | GOT2              |
|                   | MST1              | MAN1C1            | QDPR              | GPT2              |
|                   | NDST3             | MSRA              | STEAP4            | GZMH              |
|                   | PCK2              | MST1              | TMPRSS6           | HAAO              |
|                   | PHYHD1            | NDST3             | XDH               | HABP2             |
|                   | SLC25A11          | OGDHL             |                   | HAO1              |
|                   | TAT               | PCK2              |                   | HAO2              |
|                   | TK2               | PHYHD1            |                   | HEBP1             |
|                   | TMPRSS6           | RDH16             |                   | HPD               |
|                   | UPB1              | STEAP4            |                   | IVD               |
|                   | XDH               | TAT               |                   | KLKB1             |
|                   |                   | TK2               |                   | LDHD              |

---

**Targets of oncogenic miRNAs**

---

| <b>miR-330-3p</b> | <b>miR-671-3p</b> | <b>miR-671-5p</b> | <b>miR-877-5p</b> | <b>miR-939-5p</b> |
|-------------------|-------------------|-------------------|-------------------|-------------------|
|                   |                   | UPB1              |                   | MASP1             |
|                   |                   | XDH               |                   | MSRA              |
|                   |                   |                   |                   | MST1              |
|                   |                   |                   |                   | NDST3             |
|                   |                   |                   |                   | PCK1              |
|                   |                   |                   |                   | PCK2              |
|                   |                   |                   |                   | PHYHD1            |
|                   |                   |                   |                   | PIPOX             |
|                   |                   |                   |                   | PPARGC1A          |
|                   |                   |                   |                   | SLC25A11          |
|                   |                   |                   |                   | TAT               |
|                   |                   |                   |                   | TK2               |
|                   |                   |                   |                   | TMPRSS6           |
|                   |                   |                   |                   | UPB1              |
|                   |                   |                   |                   | UROC1             |
|                   |                   |                   |                   | XDH               |

---
