# Supplementary material for: Systems biology based meth-miRNA–mRNA regulatory network identifies metabolic imbalance and hyperactive cell cycle signaling involved in hepatocellular carcinoma onset and progression
Source: Springer Nature journal article supplement (doi:10.1186/s12935-019-0804-3), 2019-04-08
Supplement: MOESM6 [file 16629798]

**Table S4 List of hypermethylated tumor suppressors and hypomethylated oncogenes in meth-miRNA-mRNA network.**

| <b>Hypermethylated tumor suppressors</b> |         |         |        |          |          |
|------------------------------------------|---------|---------|--------|----------|----------|
| ACADS                                    | C5      | CYP4F12 | FCN2   | KLKB1    | SLC25A11 |
| ACSM5                                    | C7      | CYP4F3  | FDX1   | LDHD     | SLC27A5  |
| ADH1A                                    | CAT     | CYP4V2  | FGB    | MASP1    | SRD5A2   |
| ADH6                                     | CBR4    | CYP8B1  | FMO2   | MSRA     | STEAP4   |
| ADI1                                     | CBS     | DAO     | FMO3   | NDST3    | TAT      |
| AGXT                                     | CFB     | DBH     | GFOD1  | NR1I2    | TK2      |
| AKR1D1                                   | CFP     | DGAT2   | GGT5   | OGDHL    | TMPRSS6  |
| ALAS1                                    | CSAD    | DHTKD1  | GOT2   | PHYHD1   | UROCI    |
| ALDH2                                    | CYB5D2  | ECHS1   | GPT    | PROZ     |          |
| ALDH9A1                                  | CYP2C19 | EPHX2   | HEBP1  | QDPR     |          |
| ALPL                                     | CYP2C8  | ETFDH   | HGFAC  | RDH16    |          |
| AMDHD1                                   | CYP2C9  | F12     | HPD    | SAT2     |          |
| C1RL                                     | CYP3A43 | F2      | INMT   | SDS      |          |
| <b>Hypomethylated oncogenes</b>          |         |         |        |          |          |
| AATF                                     | CDCA3   | EIF2S2  | MAD2L1 | POLA2    | SGOL2    |
| AGFG1                                    | CDK2    | EIF2S3  | MASTL  | POLR3C   | SNRPA    |
| ANLN                                     | CDK5    | EXO1    | MCM2   | POLR3F   | SNRPD1   |
| APAF1                                    | CENPH   | FAM83D  | ME2    | PPAT     | SPC25    |
| APEX2                                    | CENPJ   | FASTKD3 | MELK   | PPM1G    | SQLE     |
| ATP7A                                    | CEP250  | FEN1    | MKI67  | PRKAA2   | SSB      |
| AURKB                                    | CHAF1B  | FIGNL1  | MSH2   | PRKDC    | STMN1    |
| BIRC5                                    | CHEK1   | GRPEL2  | NAE1   | PSMA1    | TDG      |
| BUB3                                     | CKAP5   | GTPBP4  | NCAPG  | PTTG1    | TK1      |
| CAD                                      | CSNK2A1 | HDAC1   | NCL    | RFC4     | TOP2A    |
| CCNB1                                    | CSTF2   | ILF2    | NME7   | RIT1     | UBE2O    |
| CCNF                                     | DARS2   | KIF11   | NUP43  | RNASEH1  | UBE2T    |
| CCT4                                     | DLGAP5  | KIF14   | OIP5   | RNASEH2A | VRK2     |
| CCT6A                                    | DNM1L   | KIF15   | PBK    | RRM2     |          |
| CDC123                                   | E2F7    | LARP4B  | PCNA   | SF3B4    |          |
| CDC20                                    | EFTUD2  | LIN9    | PLK1   | SGOL1    |          |
