# Supplementary material for: Systems biology based meth-miRNA–mRNA regulatory network identifies metabolic imbalance and hyperactive cell cycle signaling involved in hepatocellular carcinoma onset and progression
Source: Springer Nature journal article supplement (doi:10.1186/s12935-019-0804-3), 2019-04-08
Supplement: MOESM7 [file 16629798]

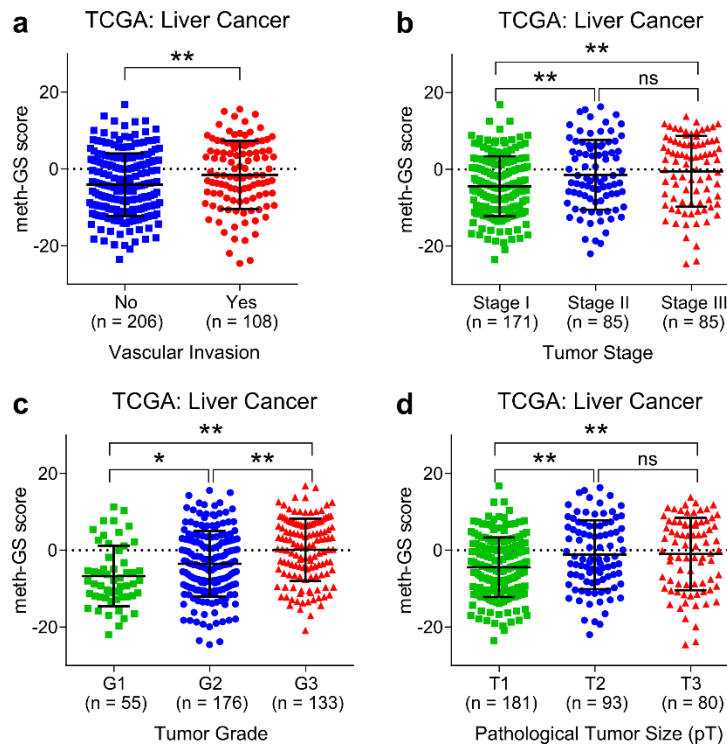

**Fig. S3 Hypermethylation driven inhibition of metabolic pathways and hypomethylation driven activation of cell cycle signaling are associated with aggressive disease state in HCC.** Dot-plot showing meth-GS scores of HCC patients who experienced or did not experience vascular invasion in TCGA database (**a**). Dot-plot showing meth-GS scores of HCC patients representing different tumor stages (stage I, II or III) in TCGA database (**b**). Dot-plot showing meth-GS scores of HCC patients representing different tumor grades (G1, G2 or G3) in TCGA database (**c**). Dot-plot showing meth-GS scores of HCC patients representing different pathological tumor size (T1, T2 or T3) in TCGA database (**d**). \* $P < 0.05$ ; \*\* $P < 0.01$ ; ns, not significant, Student's t-test.
