# Supplementary material for: Systems biology based meth-miRNA–mRNA regulatory network identifies metabolic imbalance and hyperactive cell cycle signaling involved in hepatocellular carcinoma onset and progression
Source: Springer Nature journal article supplement (doi:10.1186/s12935-019-0804-3), 2019-04-08
Supplement: MOESM8 [file 16629798]

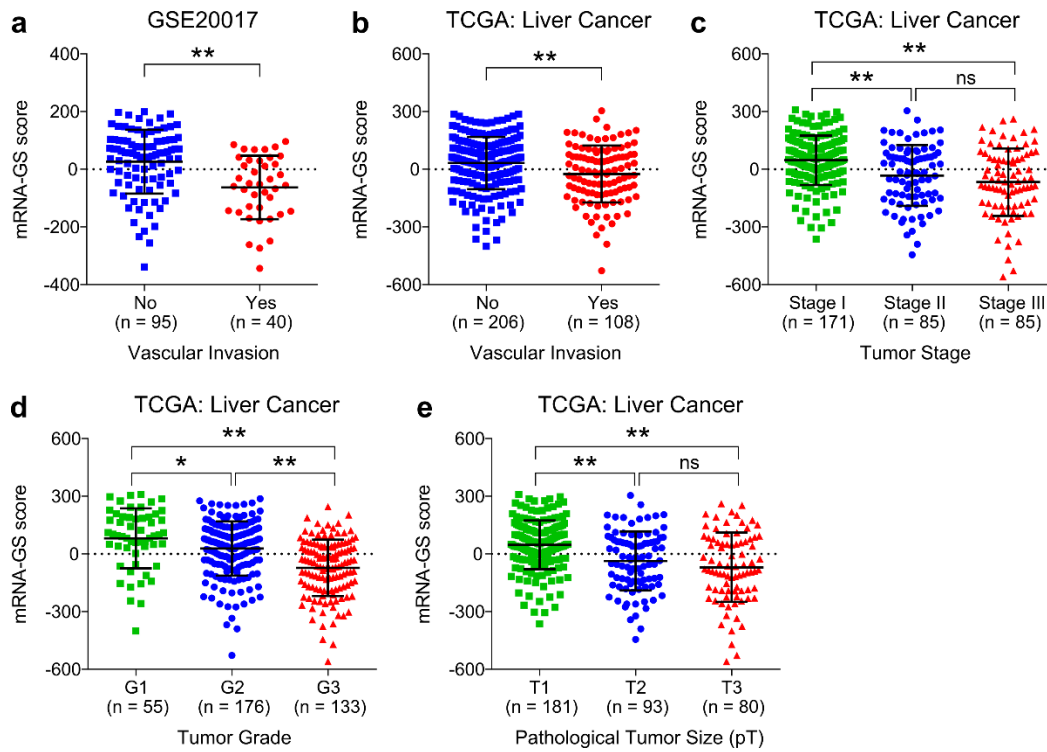

**Fig. S4 mRNA-GS is associated with less aggressive state in HCC.** Dot-plots showing mRNA-GS scores of HCC patients who experienced or did not experience vascular invasion in GEO dataset GSE20017 (a) and TCGA database (b). Dot-plot showing mRNA-GS scores of HCC patients representing different tumor stages (stage I, II or III) in TCGA database (c). Dot-plot showing mRNA-GS scores of HCC patients representing different tumor grades (G1, G2 or G3) in TCGA database (d). Dot-plot showing mRNA-GS scores of HCC patients representing different pathological tumor size (T1, T2 or T3) in TCGA database (e). \*P < 0.05; \*\*P < 0.01; ns, not significant, Student's t-test.
